# Supplementary material
Source: publisher figshare collection journal article supplement (https://frontiersin.figshare.com/ndownloader/files/34496753)
Supplement: Supplementary file [file 34496753]

## Supplementary Material

### 1 Supplementary Tables

**Supplementary Table 1.** Group level median values of the correlations and SNRs, averaged over measurement runs. The table summarizes the boxplots in figure 8. The difference columns indicate the improvement of each approach to *Sensor*. The numbers marked in bold indicate the highest metrics among approaches.

| Kinematic           | Approach | Correlation   | Diff. Corr.   | SNR            | Diff. SNR     |
|---------------------|----------|---------------|---------------|----------------|---------------|
| Horizontal position | Sensor   | 0.3627        |               | -1.3980        |               |
|                     | Mean     | 0.3839        | 0.0212        | -1.5148        | -0.1168       |
|                     | PCA      | 0.3903        | 0.0276        | -1.3064        | 0.0916        |
|                     | LPP      | 0.3636        | 0.0008        | -1.7070        | -0.3090       |
|                     | Mean+MRI | 0.3877        | 0.0250        | <b>-1.2552</b> | <b>0.1428</b> |
|                     | PCA+MRI  | <b>0.3908</b> | <b>0.0281</b> | -1.2682        | 0.1298        |
|                     | LPP+MRI  | 0.3643        | 0.0016        | -1.7072        | -0.3092       |
| Horizontal velocity | Sensor   | 0.4073        |               | -0.9902        |               |
|                     | Mean     | 0.4312        | 0.0239        | -1.2296        | -0.2394       |
|                     | PCA      | 0.4289        | 0.0216        | -1.0520        | -0.0618       |
|                     | LPP      | 0.3750        | -0.0323       | -1.3810        | -0.3908       |
|                     | Mean+MRI | <b>0.4318</b> | <b>0.0245</b> | -1.0117        | -0.0215       |
|                     | PCA+MRI  | 0.4299        | 0.0226        | <b>-0.9863</b> | <b>0.0039</b> |
|                     | LPP+MRI  | 0.4079        | 0.0006        | -1.4987        | -0.5085       |
| Vertical position   | Sensor   | <b>0.2875</b> |               | -2.4084        |               |
|                     | Mean     | 0.2674        | -0.0201       | -2.3694        | 0.0390        |
|                     | PCA      | 0.2854        | -0.0021       | <b>-2.2154</b> | <b>0.1930</b> |
|                     | LPP      | 0.2624        | -0.0251       | -2.6015        | -0.1931       |
|                     | Mean+MRI | 0.2837        | -0.0038       | -2.2452        | 0.1632        |
|                     | PCA+MRI  | 0.2589        | -0.0286       | -2.3145        | 0.0939        |
|                     | LPP+MRI  | 0.2814        | -0.0061       | -2.5688        | -0.1604       |
| Vertical velocity   | Sensor   | 0.3248        |               | <b>-1.4513</b> |               |
|                     | Mean     | 0.3004        | -0.0244       | -1.5786        | -0.1273       |
|                     | PCA      | <b>0.3295</b> | <b>0.0047</b> | -1.5360        | -0.0847       |
|                     | LPP      | 0.3090        | -0.0159       | -1.7739        | -0.3226       |
|                     | Mean+MRI | 0.3059        | -0.0189       | -1.5713        | -0.1200       |
|                     | PCA+MRI  | 0.2995        | -0.0253       | -1.5266        | -0.0753       |
|                     | LPP+MRI  | 0.3215        | -0.0033       | -1.9875        | -0.5362       |
| Distance            | Sensor   | 0.0873        |               | -3.7628        |               |
|                     | Mean     | 0.0950        | 0.0077        | -3.6334        | 0.1294        |
|                     | PCA      | 0.1067        | 0.0194        | -3.5644        | 0.1984        |
|                     | LPP      | 0.0839        | -0.0034       | -3.8965        | -0.1337       |
|                     | Mean+MRI | 0.1038        | 0.0165        | -3.6062        | 0.1566        |
|                     | PCA+MRI  | <b>0.1091</b> | <b>0.0218</b> | <b>-3.5002</b> | <b>0.2626</b> |
|                     | LPP+MRI  | 0.0734        | -0.0139       | -4.1642        | -0.4014       |
| Speed               | Sensor   | 0.1896        |               | -3.2620        |               |
|                     | Mean     | 0.1952        | 0.0056        | -3.2424        | 0.0196        |
|                     | PCA      | 0.1930        | 0.0034        | -3.1768        | 0.0852        |
|                     | LPP      | 0.1388        | -0.0508       | -3.6529        | -0.3909       |
|                     | Mean+MRI | 0.1805        | -0.0091       | -3.3081        | -0.0461       |
|                     | PCA+MRI  | <b>0.1976</b> | <b>0.0080</b> | <b>-3.1370</b> | <b>0.1250</b> |
|                     | LPP+MRI  | 0.1359        | -0.0537       | -4.0134        | -0.7514       |

## 2 Supplementary Figures

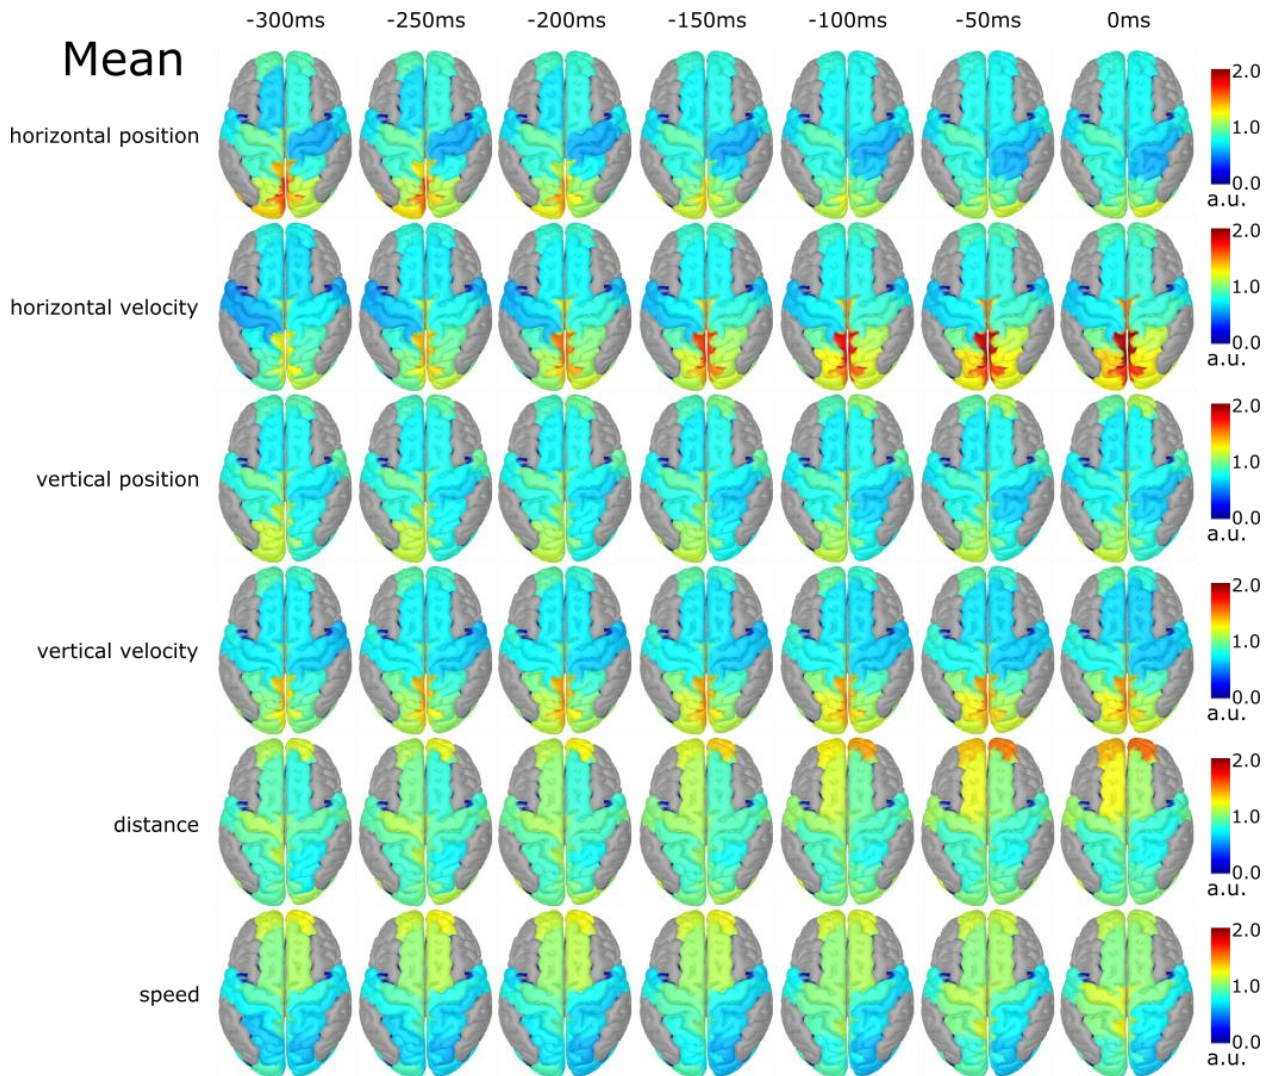

**Supplementary Figure 1.** The decoding pattern of *Mean* of the multilags source-space signals between -300ms to 0ms

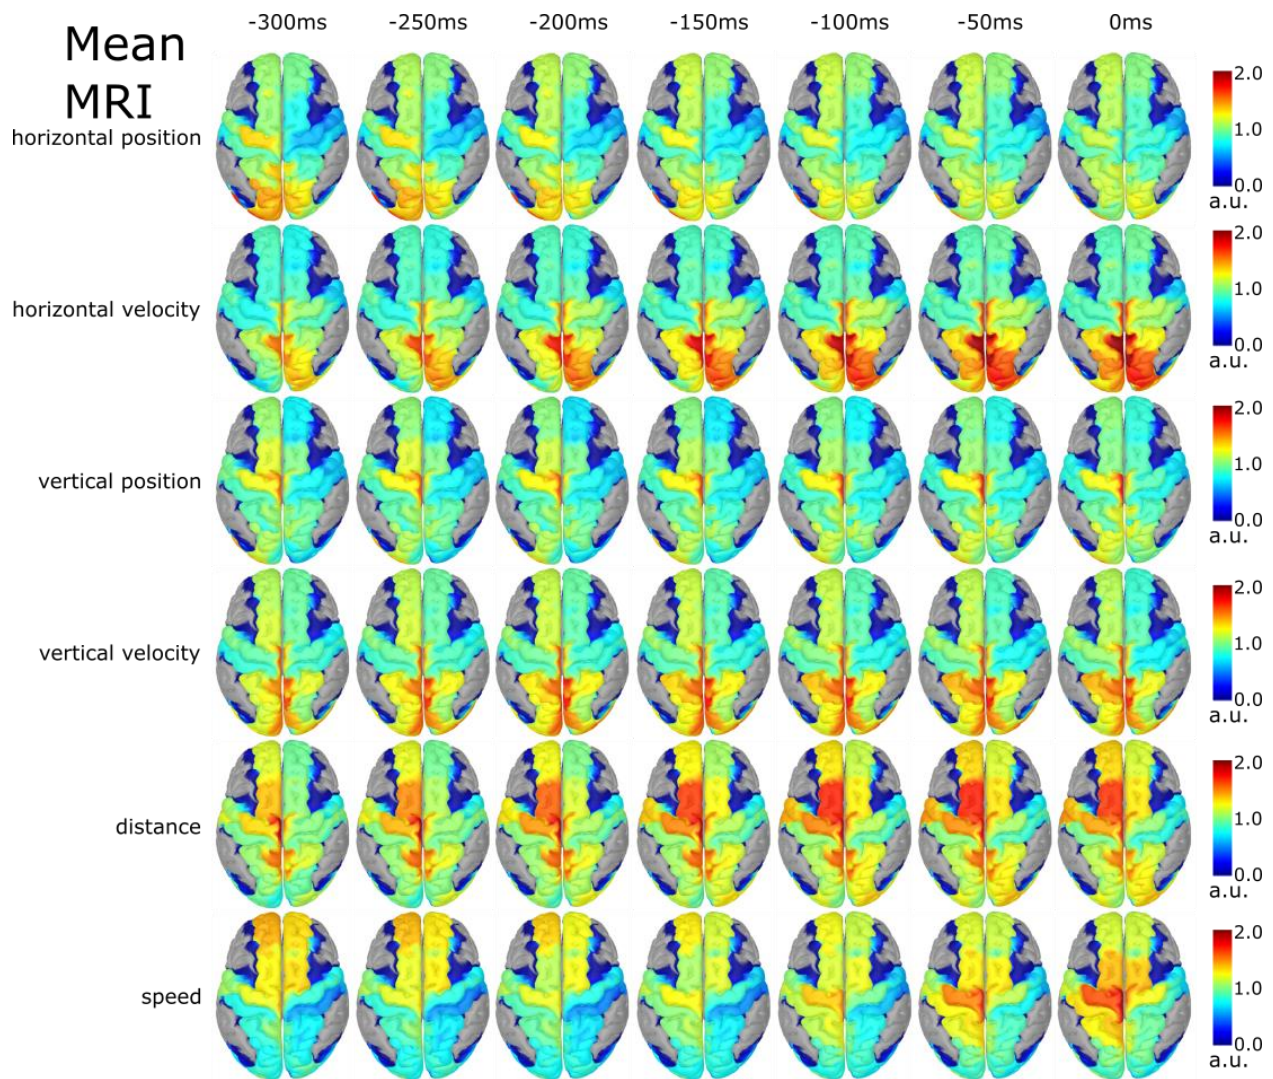

**Supplementary Figure 2.** The decoding pattern of *Mean+MRI* of the multilags source-space signals between -300ms to 0ms



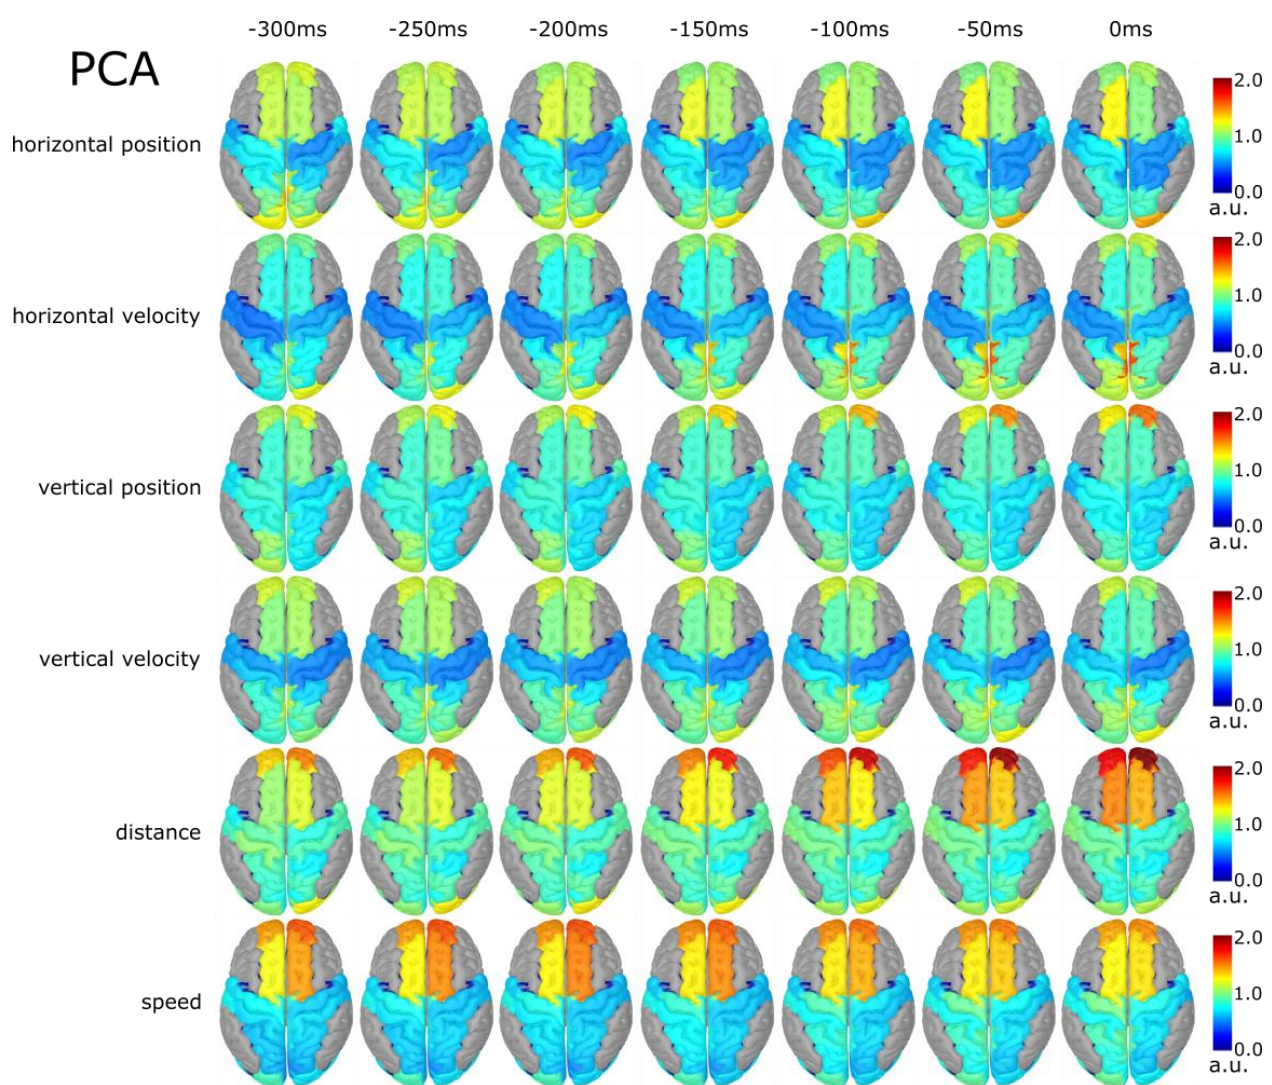

**Supplementary Figure 3.** The decoding pattern of *PCA* of the multilags source-space signals between -300ms to 0ms

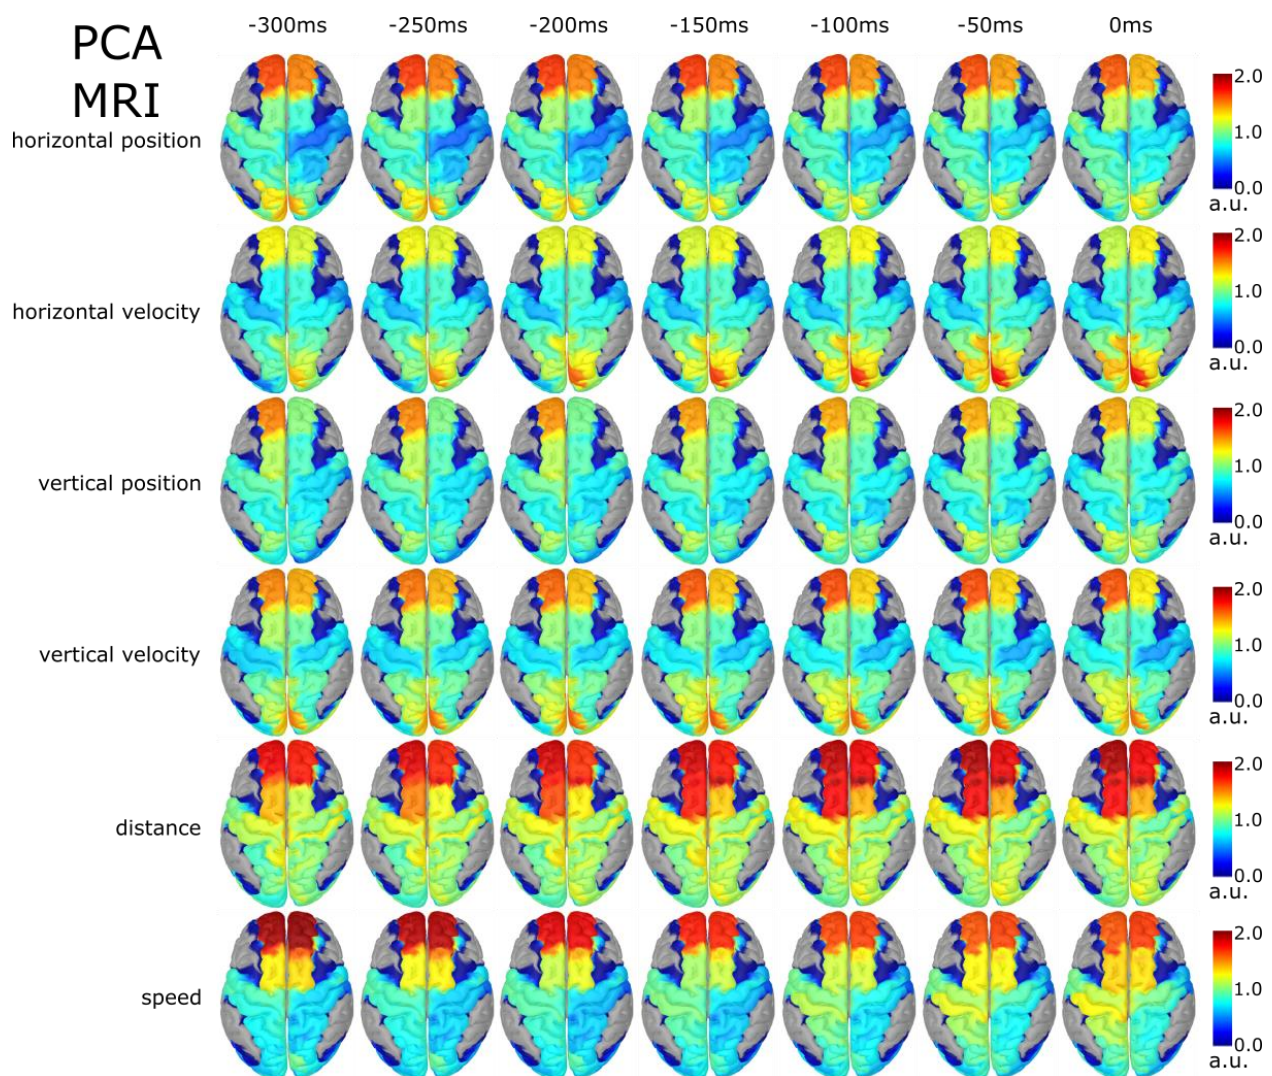

**Supplementary Figure 4.** The decoding pattern of *PCA+MRI* of the multilags source-space signals between -300ms to 0ms



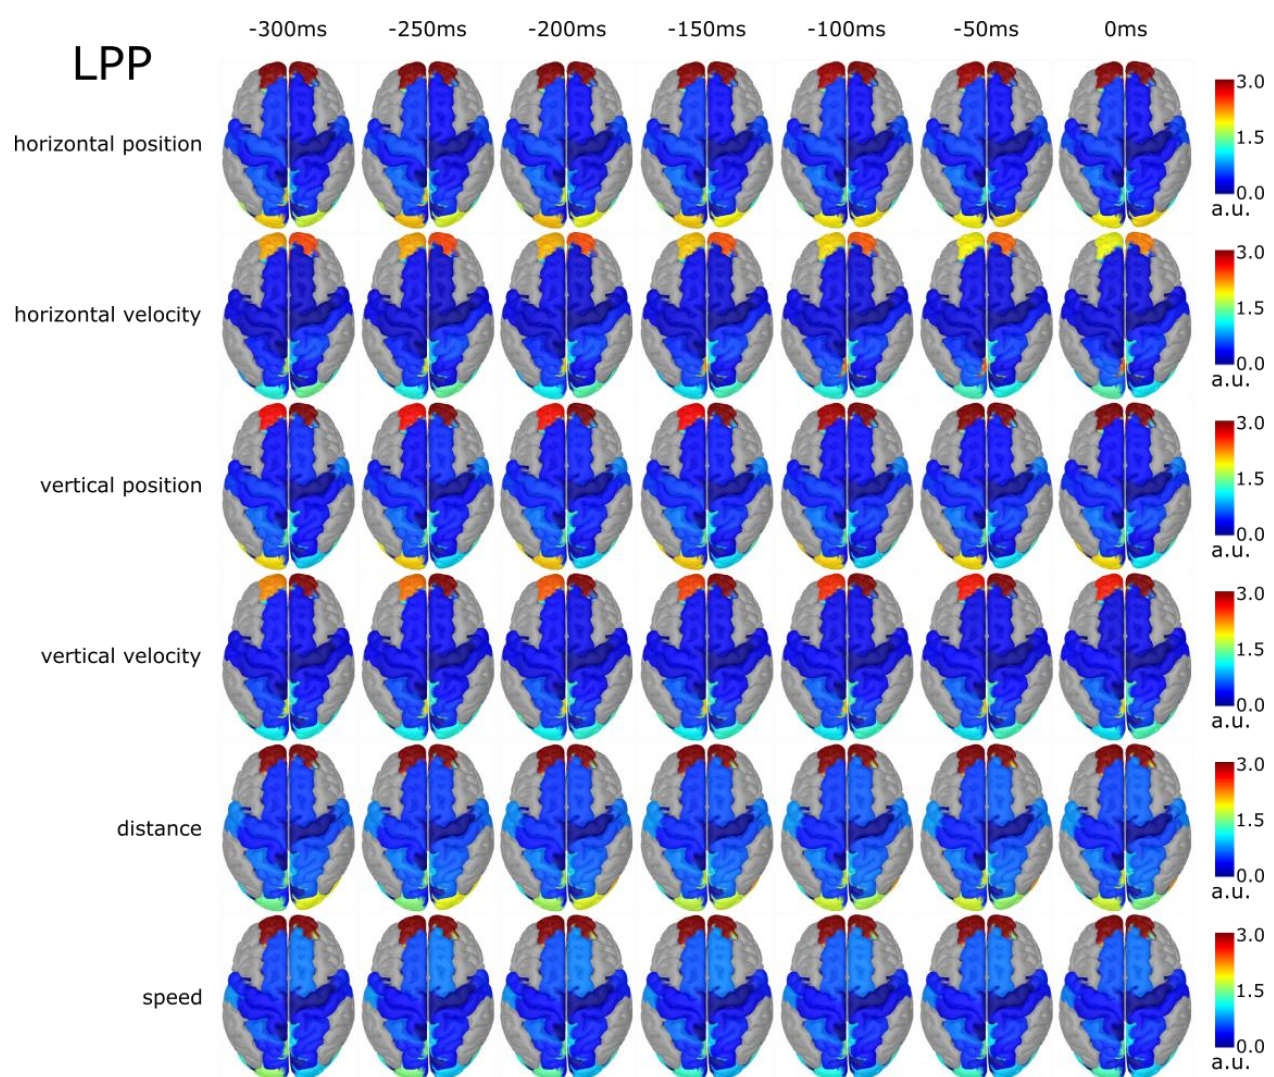

**Supplementary Figure 5.** The decoding pattern of *LPP* of the multilags source-space signals between -300ms to 0ms

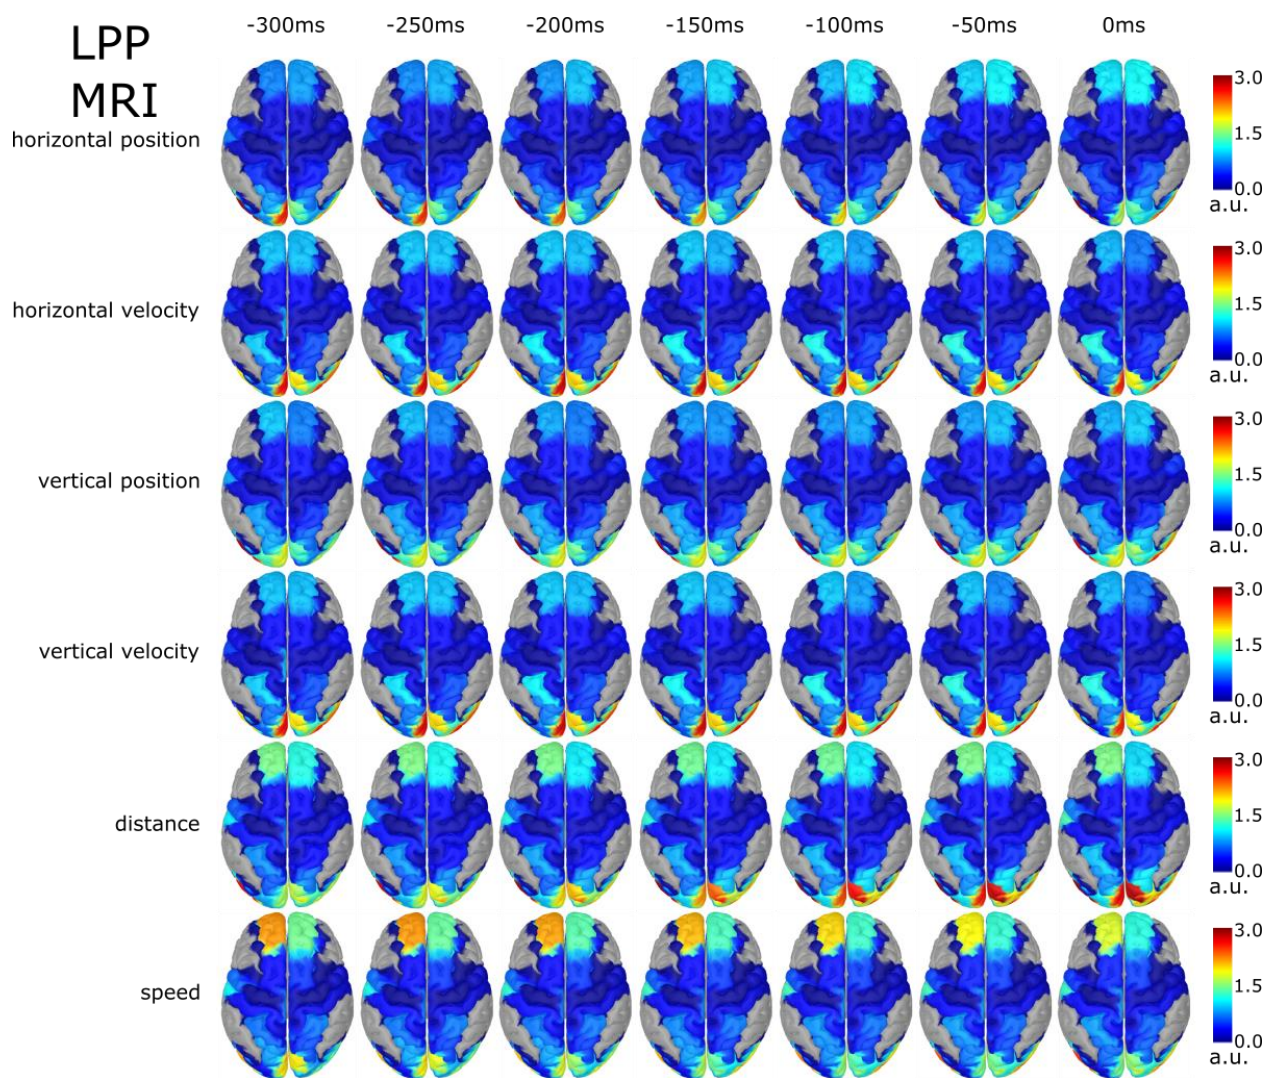

**Supplementary Figure 6.** The decoding pattern of *LPP+MRI* of the multilags source-space signals between -300ms to 0ms
